# Supplementary material for: Semiconducting single-walled carbon nanotubes sorting with a removable solubilizer based on dynamic supramolecular coordination chemistry
Source: Springer Nature journal article supplement (doi:10.1038/ncomms6041), 2014-10-03
Supplement: 41467_2014_BFncomms6041_MOESM1_ESM.mol [file 41467_2014_BFncomms6041_MOESM1_ESM.mol]

  ChemDraw09151408582D

 61 69  0  0  0  0  0  0  0  0999 V2000
   -0.4151    2.3261    0.0000 C   0  0  0  0  0  0  0  0  0  0  0  0
   -0.6286    1.5292    0.0000 C   0  0  0  0  0  0  0  0  0  0  0  0
    0.0633    1.0799    0.0000 C   0  0  0  0  0  0  0  0  0  0  0  0
    0.7045    1.5991    0.0000 C   0  0  0  0  0  0  0  0  0  0  0  0
    0.4088    2.3261    0.0000 C   0  0  0  0  0  0  0  0  0  0  0  0
   -0.9984    2.9095    0.0000 C   0  0  0  0  0  0  0  0  0  0  0  0
   -1.7953    2.6959    0.0000 C   0  0  0  0  0  0  0  0  0  0  0  0
   -2.0088    1.8990    0.0000 C   0  0  0  0  0  0  0  0  0  0  0  0
   -1.4255    1.3157    0.0000 C   0  0  0  0  0  0  0  0  0  0  0  0
    1.4819    1.4916    0.0000 C   0  0  0  0  0  0  0  0  0  0  0  0
    1.9637    2.1111    0.0000 C   0  0  0  0  0  0  0  0  0  0  0  0
    1.6681    2.8382    0.0000 C   0  0  0  0  0  0  0  0  0  0  0  0
    0.8906    2.9456    0.0000 C   0  0  0  0  0  0  0  0  0  0  0  0
   -2.8057    1.6855    0.0000 C   0  0  0  0  0  0  0  0  0  0  0  0
    2.7809    1.9982    0.0000 C   0  0  0  0  0  0  0  0  0  0  0  0
   -3.6026    1.4720    0.0000 C   0  0  0  0  0  0  0  0  0  0  0  0
    3.5982    1.8852    0.0000 C   0  0  0  0  0  0  0  0  0  0  0  0
   -4.3995    1.2585    0.0000 C   0  0  0  0  0  0  0  0  0  0  0  0
    4.4154    1.7722    0.0000 C   0  0  0  0  0  0  0  0  0  0  0  0
   -4.9829    1.8418    0.0000 C   0  0  0  0  0  0  0  0  0  0  0  0
   -5.7798    1.6283    0.0000 C   0  0  0  0  0  0  0  0  0  0  0  0
   -5.9933    0.8314    0.0000 C   0  0  0  0  0  0  0  0  0  0  0  0
   -5.4099    0.2480    0.0000 C   0  0  0  0  0  0  0  0  0  0  0  0
   -4.6130    0.4616    0.0000 C   0  0  0  0  0  0  0  0  0  0  0  0
   -6.3631    2.2117    0.0000 C   0  0  0  0  0  0  0  0  0  0  0  0
   -7.1600    1.9981    0.0000 C   0  0  0  0  0  0  0  0  0  0  0  0
   -7.3735    1.2012    0.0000 C   0  0  0  0  0  0  0  0  0  0  0  0
   -6.7902    0.6179    0.0000 N   0  0  0  0  0  0  0  0  0  0  0  0
   -5.6234   -0.5488    0.0000 N   0  0  0  0  0  0  0  0  0  0  0  0
   -5.0401   -1.1322    0.0000 C   0  0  0  0  0  0  0  0  0  0  0  0
   -4.2432   -0.9187    0.0000 C   0  0  0  0  0  0  0  0  0  0  0  0
   -4.0297   -0.1218    0.0000 C   0  0  0  0  0  0  0  0  0  0  0  0
    4.7262    1.0080    0.0000 C   0  0  0  0  0  0  0  0  0  0  0  0
    5.5434    0.8950    0.0000 C   0  0  0  0  0  0  0  0  0  0  0  0
    6.0499    1.5463    0.0000 C   0  0  0  0  0  0  0  0  0  0  0  0
    5.7391    2.3105    0.0000 C   0  0  0  0  0  0  0  0  0  0  0  0
    4.9218    2.4235    0.0000 C   0  0  0  0  0  0  0  0  0  0  0  0
    6.8671    1.4333    0.0000 N   0  0  0  0  0  0  0  0  0  0  0  0
    7.3735    2.0846    0.0000 C   0  0  0  0  0  0  0  0  0  0  0  0
    7.0628    2.8488    0.0000 C   0  0  0  0  0  0  0  0  0  0  0  0
    6.2455    2.9618    0.0000 C   0  0  0  0  0  0  0  0  0  0  0  0
    4.2197    0.3568    0.0000 C   0  0  0  0  0  0  0  0  0  0  0  0
    4.5305   -0.4075    0.0000 C   0  0  0  0  0  0  0  0  0  0  0  0
    5.3477   -0.5204    0.0000 C   0  0  0  0  0  0  0  0  0  0  0  0
    5.8542    0.1308    0.0000 N   0  0  0  0  0  0  0  0  0  0  0  0
    0.8602    0.8663    0.0000 C   0  0  0  0  0  0  0  0  0  0  0  0
    1.0737    0.0695    0.0000 C   0  0  0  0  0  0  0  0  0  0  0  0
    1.8706   -0.1441    0.0000 C   0  0  0  0  0  0  0  0  0  0  0  0
    2.0841   -0.9410    0.0000 C   0  0  0  0  0  0  0  0  0  0  0  0
    2.8810   -1.1545    0.0000 C   0  0  0  0  0  0  0  0  0  0  0  0
    3.0946   -1.9514    0.0000 C   0  0  0  0  0  0  0  0  0  0  0  0
    3.8915   -2.1649    0.0000 C   0  0  0  0  0  0  0  0  0  0  0  0
    4.1050   -2.9618    0.0000 C   0  0  0  0  0  0  0  0  0  0  0  0
   -0.7336    0.8663    0.0000 C   0  0  0  0  0  0  0  0  0  0  0  0
   -0.9471    0.0695    0.0000 C   0  0  0  0  0  0  0  0  0  0  0  0
   -1.7440   -0.1441    0.0000 C   0  0  0  0  0  0  0  0  0  0  0  0
   -1.9575   -0.9410    0.0000 C   0  0  0  0  0  0  0  0  0  0  0  0
   -2.7544   -1.1545    0.0000 C   0  0  0  0  0  0  0  0  0  0  0  0
   -2.9679   -1.9514    0.0000 C   0  0  0  0  0  0  0  0  0  0  0  0
   -3.7648   -2.1649    0.0000 C   0  0  0  0  0  0  0  0  0  0  0  0
   -3.9783   -2.9618    0.0000 C   0  0  0  0  0  0  0  0  0  0  0  0
  1  2  2  0      
  2  3  1  0      
  3  4  1  0      
  4  5  2  0      
  5  1  1  0      
  1  6  1  0      
  6  7  2  0      
  7  8  1  0      
  8  9  2  0      
  9  2  1  0      
  4 10  1  0      
 10 11  2  0      
 11 12  1  0      
 12 13  2  0      
 13  5  1  0      
  8 14  1  0      
 11 15  1  0      
 14 16  3  0      
 15 17  3  0      
 16 18  1  0      
 17 19  1  0      
 18 20  2  0      
 20 21  1  0      
 21 22  2  0      
 22 23  1  0      
 23 24  2  0      
 24 18  1  0      
 21 25  1  0      
 25 26  2  0      
 26 27  1  0      
 27 28  2  0      
 28 22  1  0      
 23 29  1  0      
 29 30  2  0      
 30 31  1  0      
 31 32  2  0      
 32 24  1  0      
 19 33  2  0      
 33 34  1  0      
 34 35  2  0      
 35 36  1  0      
 36 37  2  0      
 37 19  1  0      
 35 38  1  0      
 38 39  2  0      
 39 40  1  0      
 40 41  2  0      
 41 36  1  0      
 33 42  1  0      
 42 43  2  0      
 43 44  1  0      
 44 45  2  0      
 45 34  1  0      
  3 46  1  0      
 46 47  1  0      
 47 48  1  0      
 48 49  1  0      
 49 50  1  0      
 50 51  1  0      
 51 52  1  0      
 52 53  1  0      
  3 54  1  0      
 54 55  1  0      
 55 56  1  0      
 56 57  1  0      
 57 58  1  0      
 58 59  1  0      
 59 60  1  0      
 60 61  1  0      
M  END
